# Supplementary material for: Fluorimetric and ratiometric colorimetric dual-mode detection of organophosphorus pesticides based on carbon dots/DTNB
Source: Royal Society of Chemistry journal article supplement (doi:10.1039/d1nj06011b), 2022-01-01
Supplement: d1nj06011b1.pdf [file d1nj06011b1.pdf]

## Supporting information

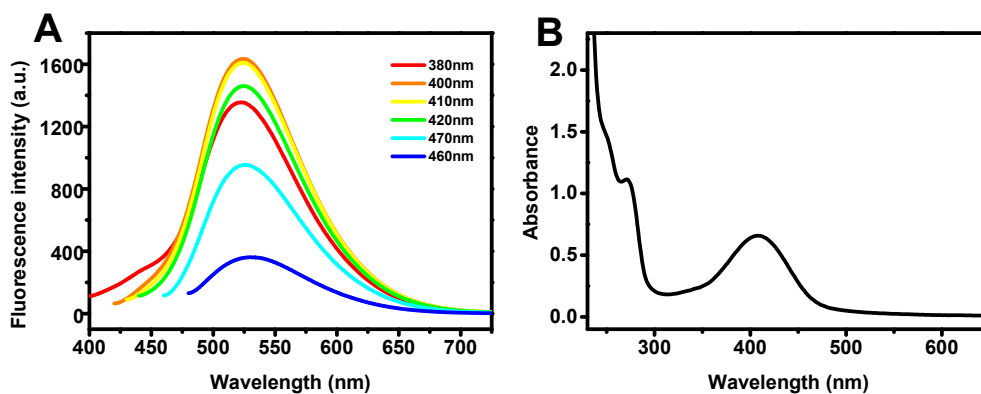

Fig. S1 (A) The emission spectra and (B) the absorption spectrum of the CDs.

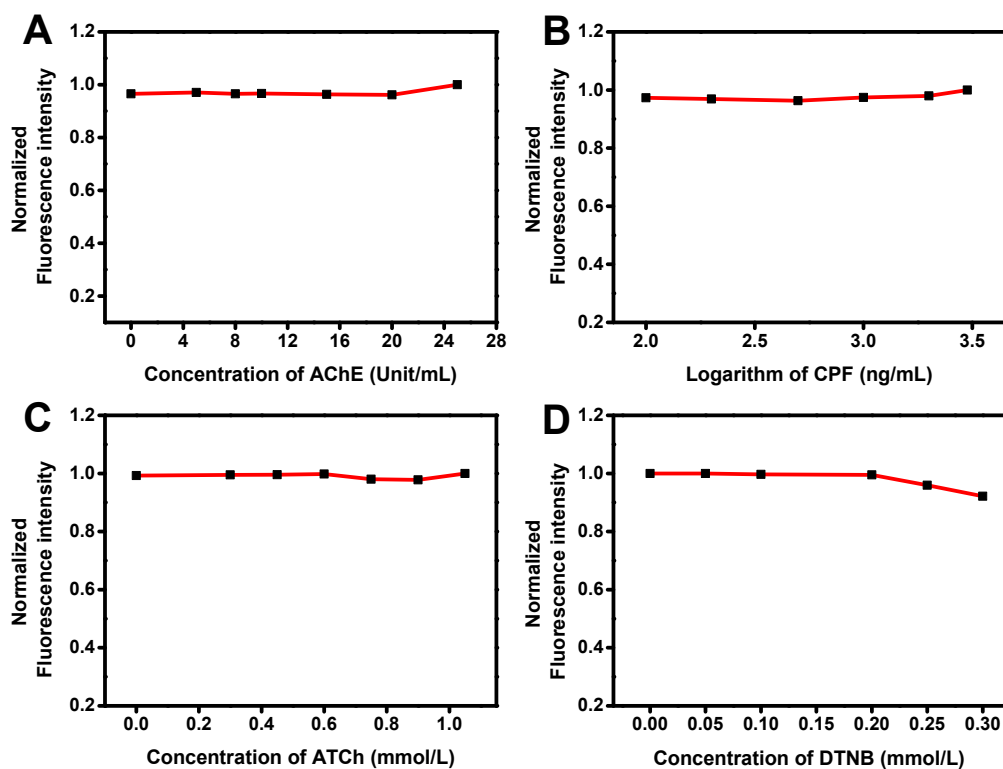

Fig. S2 The influences of individual AChE, CPF, ATCh, and DTNB on the fluorescence intensity of the CDs.

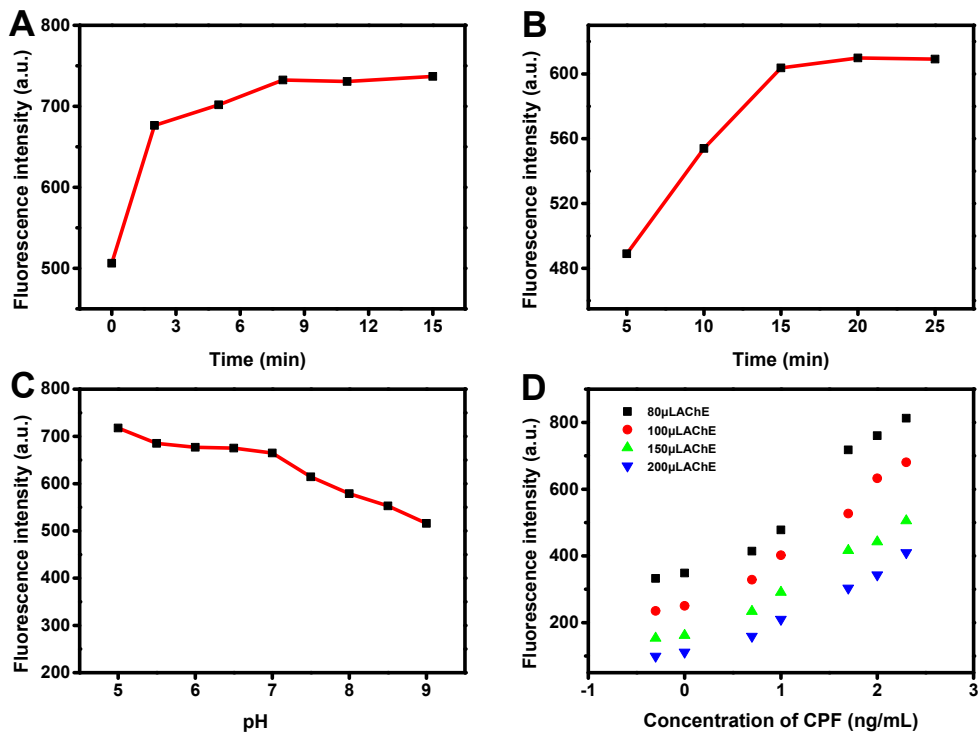

**Fig. S3** The effects of (A) pre-incubation time, (B) post incubation time, (C) pH and the concentration of AChE on the fluorescence intensity of the CDs.
